# 1 **Care seeking for diarrheal illness: a systematic review and meta-analysis**

2

3 Kirsten E. Wiens<sup>1</sup>, Marissa H. Miller<sup>1</sup>, Daniel J. Costello<sup>1,4</sup>, Ashlynn P. Solomon<sup>1</sup>, Skye M.

4 Hilbert<sup>1</sup>, Andrea G. Shipper<sup>2</sup>, Elizabeth C. Lee<sup>3</sup>, Andrew S. Azman<sup>3,5</sup>

5

6 <sup>1</sup> Department of Epidemiology and Biostatistics, College of Public Health, Temple University,

7 Philadelphia, USA

8 <sup>2</sup> Charles Library, Temple University, Philadelphia, USA

9 <sup>3</sup> Department of Epidemiology, Johns Hopkins Bloomberg School of Public Health, Johns

10 Hopkins University, Baltimore, USA

11 <sup>4</sup> Department of Epidemiology, Milken Institute School of Public Health, The George Washington

12 University, Washington, DC, USA

13 <sup>5</sup> Geneva Centre for Emerging Viral Diseases and Division of Tropical and Humanitarian

14 Medicine, Geneva University Hospitals, Geneva, Switzerland

15

## 16 **Corresponding author**

17 Kirsten E. Wiens, PhD

18 Assistant Professor

19 Department of Epidemiology and Biostatistics

20 Temple University College of Public Health

21 1301 Cecil B. Moore Avenue, Ritter Annex 911

22 Philadelphia, PA 19122

23 [kirsten.wiens@temple.edu](mailto:kirsten.wiens@temple.edu)

24

25 Abstract

26 **Background**

27 Monitoring and treating diarrheal illness often rely on individuals seeking care at hospitals or  
28 clinics. Cases that seek care through pharmacies and community health workers (CHW) are  
29 frequently excluded from disease burden estimates, which are used to allocate mitigation  
30 resources. Studies on care seeking behavior can help identify these gaps but typically focus on  
31 children under five, even though diarrheal diseases like cholera and Enterotoxigenic E. coli  
32 affect all age groups. This study aimed to estimate the proportion of individuals seeking care for  
33 themselves or their children with diarrhea, considering different age groups, case definitions,  
34 and study settings.

35

36 **Methods and Findings**

37 We conducted a systematic review of population-based primary research studies published  
38 during 2000–2024 that examined care-seeking behavior for diarrhea. We included 166 studies  
39 from 62 countries. Hospitals and clinics were the most common source of care sought outside  
40 the home, with CHW and health posts rarely reported. Using a random-effects meta-analysis,  
41 we found substantial heterogeneity in care seeking between studies from low- and middle-  
42 income countries ( $I^2 = 99.3$ ) and estimated that the proportion of diarrhea cases seeking care at  
43 a hospital or clinic was 32.8% on average (95% Confidence Interval (CI) 28.1% to 37.9%;  
44 prediction interval 3.3% to 87.5%). Although there were trends toward higher care-seeking for  
45 children compared to adults, substantial variation existed between studies, and the differences  
46 were not significant. We estimated that the adjusted odds of seeking care at a hospital or clinic  
47 were significantly higher for severe diarrhea and cholera compared to general diarrhea (Odds  
48 Ratio 3.43; 95% CI 1.71 to 6.88).

49

50 **Conclusions**

51 Our findings confirm that passive surveillance through hospitals and clinics may substantially  
52 undercount the number of people with diarrhea, particularly those with milder symptoms,  
53 although this proportion varied widely. Additionally, our findings underscore the importance of  
54 including care seeking questions across all age groups in future studies, as we cannot assume  
55 lower care seeking for adults across all settings. Our study was limited by fewer data on care-  
56 seeking from health posts, traditional healers, and CHW compared to hospitals and clinics,  
57 highlighting a need for further research on these sources of care.

58

## 59 Introduction

60 Diarrheal diseases are a leading cause of illness and death worldwide, particularly among  
61 children under five [1,2]. Diarrhea burden estimates rely partly on data from population-based  
62 surveys focused on children, which use caregiver recall of recent symptoms [1,2]. In adults and  
63 for specific pathogens, estimates are often based on passive surveillance data, such as hospital  
64 records and vital statistics [1,2]. These data are especially valuable for tracking seasonal  
65 outbreaks of pathogens like cholera that may not appear in surveys but depend on individuals  
66 seeking care for often severe symptoms [3,4]. A key challenge in accurately assessing diarrheal  
67 disease burden by age and etiology is determining how many cases go unreported due to  
68 barriers in care-seeking and identifying which populations or illnesses are most likely to be  
69 undercounted.

70

71 Estimates of diarrhea burden strongly influence investments in disease mitigation resources,  
72 including broad investments in improved water and sanitation and more pathogen-specific tools  
73 like vaccines. However, diarrheal pathogens vary in the symptoms they cause as well as the  
74 age groups they primarily affect. For example, rotavirus, *Escherichia coli*, and Salmonella can  
75 cause gastroenteritis with diarrhea and/or vomiting, while cholera is marked by acute watery  
76 diarrhea and/or vomiting. Rotavirus primarily affects children, whereas cholera is a leading

77 cause of diarrhea illness and deaths across all age groups [1]. Strategies for controlling  
78 rotavirus differ from those used for cholera, as its primary mode of transmission is person-to-  
79 person via the fecal-oral route, rather than through consuming contaminated food and water.  
80 Enteric pathogens also cause a range of disease severity, from mild infection to severe  
81 dehydration requiring rehydration to prevent severe outcomes including death. Given these  
82 variations, relying solely on population-level estimates of general diarrhea in children and  
83 passive surveillance data may not optimize burden reduction efforts.

84

85 Programs such as the Demographic and Healthcare Surveys (<https://dhsprogram.com/>) that  
86 assess care seeking behavior for diarrhea around the world provide an opportunity to examine  
87 these biases in disease burden estimates [5–9]. Previous analyses of these data have  
88 estimated that the proportion of caregivers that seek care at health facilities for a child with  
89 diarrhea was on average 45% in sub-Saharan Africa [10] and 49-51% in West and Central  
90 Africa [11], with substantial variation by country [12] and type of care sought [13]. Importantly,  
91 these studies all focused on care seeking for children, and did not incorporate data from studies  
92 that have reported care seeking across age groups including adults [14,15]. In addition, while  
93 one of these reviews found that more people sought care for general childhood illnesses when  
94 illness was more severe [13], none of these studies examined care seeking behavior by severity  
95 of diarrheal illness or etiology, limiting the applicability of their results.

96

97 In this study, we sought to address these knowledge gaps through a systematic review and  
98 meta-analysis of surveys conducted during 2000-2024 on diarrhea care seeking behavior  
99 across all age groups and diarrhea case definitions. Our primary research question was: what  
100 proportion of individuals of any age seek care at hospitals, clinics, or other sources when they  
101 have diarrhea? In addition, we asked: how does seeking care at hospitals or clinics vary by age  
102 group, severity of diarrheal illness, and other factors?

103

104 Methods

105

106 **Systematic review**

107 We developed the methods for this study based on the Preferred Reporting Items for  
108 Systematic Reviews and Meta-Analyses (PRISMA) guidelines [16] and submitted the protocol to  
109 the International Prospective Register of Systematic Reviews (PROSPERO) on February 24th,  
110 2023 (review ID: CRD42023402435) [17].

111

112 We searched PubMed, Embase, Web of Science, and Global Index Medicus on January 27,  
113 2023 using search terms developed by a medical librarian (AGS); searches were updated on  
114 September 3, 2024 (Supplementary Methods). We included studies that 1) included sampling  
115 on or after January 1, 2000, 2) were primary research studies, 3) were conducted in human  
116 populations, 4) included questions about diarrhea care seeking, perceptions knowledge, and/or  
117 management, 5) surveyed individuals of any age about their own care seeking for diarrheal  
118 illness, 6) reported the number of individuals surveyed about care seeking for diarrheal illness  
119 either for themselves or a child, 7) reported the number or proportion who said that they would  
120 or did seek care, and 8) were written in English, French or Spanish. We excluded studies that 1)  
121 were conducted in special populations, e.g., HIV- or malaria-infected individuals, healthcare  
122 professionals, deployed troops, travelers, or long-term care facility residents, 2) focused  
123 exclusively on non-infectious diarrhea, 3) did not separate diarrhea-related care seeking from  
124 other illnesses, 4) did not report the sampling method and study population, 5) were case  
125 studies, case-control studies where cases selected based on care seeking behavior, or  
126 qualitative studies, 6) used convenience sampling, 7) were reviews or secondary data analyses,  
127 8) were conference abstracts, or 9) did not have full texts available.

128

129 Studies were screened by title and abstract by two blinded and independent reviewers (DJC,  
130 APS, MHM, or KEW) using Covidence (<https://www.covidence.org/>). If a tiebreaker was needed,  
131 a third reviewer was used, or a decision was made by consensus. This process was repeated  
132 for full text screening. For the updated search, a single reviewer (MHM) performed the  
133 screening. One of the reviewers independently extracted data from each included study using a  
134 shared Google Sheet. Extracted data included study design, sampling method, study  
135 population, diarrhea case definition, start and end dates, study catchment area matched to a  
136 GADM polygon (<https://gadm.org/>) when possible, how the care seeking questions were  
137 phrased, who the care was sought for (e.g., self or child), recall time in days, type of care facility  
138 sought, number of individuals surveyed about diarrheal illness, whether they “would” and/or  
139 “did” seek care, and when available, age and sex distribution of the surveyed population,  
140 diarrhea symptoms, and diarrhea severity. When care seeking data were stratified by any of  
141 these variables, we extracted the data at those stratifications. If a study reported “yes”, “no”, and  
142 “maybe” for “would/will you seek care”, we coded “maybe” as “no”.

143

144 A single reviewer (SMH) evaluated the quality of the studies that met our inclusion criteria using  
145 an adapted version of the appraisal tool for cross-sectional studies (AXIS) [18]. Specifically, we  
146 assessed whether 1) the data presented in the study were internally consistent (i.e., numbers  
147 for the proportion seeking care were identical throughout the abstract, text, and tables), 2) the  
148 manuscript included a justification for their sample size, and 3) the response rate was reported  
149 [0 = no, 1 = yes]. An overall quality score was created by summing across the three indicators  
150 for total scores ranging from 0-3, where 0 was lowest quality and 3 was highest quality. Studies  
151 were not excluded based on quality assessment criteria. We retained studies with internal  
152 inconsistencies to avoid penalizing those that provided more detailed information or in-depth  
153 discussions of results, where minor differences or ambiguities often arose. Studies with major

154 ambiguities were excluded in full text screening for lacking care seeking data (for example, if it  
155 was unclear what the denominator was for the reported proportion seeking care).

156

### 157 **Data cleaning**

158 We manually reviewed studies by country, sorted by start date, to identify studies with  
159 overlapping data (i.e., conducted among the same people in the same time period with the  
160 same questions). Overlapping studies were excluded from the primary dataset, and reason for  
161 selection of the retained study was recorded in the extraction sheet. We prioritized inclusion of  
162 studies with 1) more representative sampling methods, 2) more consistent or clearly described  
163 data, 3) more specific case definition, 4) larger sample size, 5) longer sampling period, 6) more  
164 detailed age information, and 7) more detailed methods description, in that order.

165

166 Data were cleaned, checked for mistakes, and analyzed using R statistical software version  
167 4.3.3 [19]. Extracted data were checked for correct location information (e.g., could be correctly  
168 matched to a GADM shapefile, impossible values (e.g., number seeking care greater than  
169 number surveyed, start date after end date), and inconsistent values (e.g., multiple different  
170 sample sizes entered per study or stratification). Data were matched with World Bank 2023-  
171 2024 Income Classifications [20] and regions by country.

172

173 We created three standardized categories for diarrhea case definition: 1) “diarrhea” included  
174 explicit definitions of three or more loose stools in past 24 hours and diarrhea used broadly  
175 without an explicit definition; 2) “severe diarrhea or cholera” included severe diarrhea, defined  
176 as having danger signs, dehydration,  $\geq 1$  week duration, or death, and acute watery diarrhea of  
177 any severity including deaths; 3) “gastroenteritis or other etiologies” included definitions of either  
178 diarrhea or vomiting, and specific etiologies including rotavirus, Escherichia coli, Salmonella,  
179 and giardia. A single study stratified care seeking by diarrhea cases that were “moderate to

180 severe” (diarrhea with sunken eyes, loss of skin turgor, dysentery, intravenous rehydration, or  
181 hospitalization) and “less severe” (all other diarrhea) [21]; we categorized “moderate to severe”  
182 as “severe diarrhea or cholera” and “less severe” as “diarrhea”.

183

184 In addition, we created standardized categories of the source of care sought (Table S1). For the  
185 analysis of care seeking at hospitals or clinics, we defined “hospital or clinic” as any general  
186 hospital or clinic or explicitly defined public hospitals or clinics. We excluded explicitly defined  
187 private hospitals or clinics from this category because they are rarely part of surveillance  
188 systems.

189

## 190 **Meta-analysis**

191 Observations, or units for analysis, were created by aggregating extracted data by study,  
192 country, source of care sought, and potential sources of variation in care seeking (shown in  
193 Table 1). When aggregating data from studies with multiple choice questions where there were  
194 multiple different options within one category or source of care (e.g., multiple different hospitals  
195 or clinics that could have been selected), we took the maximum value across those options.

196

197 We used logistic regression models with observation-level random intercepts to pool estimates  
198 of the proportion of individuals with diarrhea that did or would seek care for diarrhea at hospitals  
199 or clinics across all included studies, implemented using the `metaprop` function of the `meta`  
200 package in R [22]. We used logistic regression models with observation-level random intercepts  
201 and fixed effects to examine the effects of diarrhea case definition, whether the study was in an  
202 urban or rural location, whether the study took place during or closely following a diarrhea  
203 outbreak, as well as other components of study methodology on care seeking in univariate and  
204 multivariate analyses, implemented using the `rma` function of the `metafor` package in R [23]. For  
205 multivariate analysis, we included variables that we identified as significantly associated with



206 care seeking ( $p < 0.05$ ) in univariate analysis but that were not significantly associated with  
207 other included variables. In addition, we performed sub-group analyses by age group and  
208 diarrhea case definition.

209

#### 210 **Data and code availability**

211 All extracted data and source code for data cleaning and meta-analysis are available at  
212 <https://github.com/wienslab/diarrhea-careseeking>.

213

#### 214 **Role of the funding source**

215 This study was supported by the Bill and Melinda Gates Foundation (INV-044865) and the  
216 National Institute of Allergy and Infectious Diseases (K22AI168389). The funders had no role in  
217 study design, data collection and analysis, decision to publish, or preparation of the manuscript.

218

#### 219 Results

##### 220 **Study characteristics**

221 We retrieved 7069 studies from four databases, screened 5188 for eligibility following de-  
222 duplication, and included 188 studies (Figure 1). Of these, 166 studies were non-overlapping  
223 and asked participants whether they did seek care for a past diarrheal illness. For the primary  
224 analysis, we stratified these study-level data by characteristics shown in Table 1, for a total of  
225 211 observations pertaining to care seeking outside of participants' homes, and 177  
226 observations pertaining to care seeking specifically at hospitals or clinics. The complete  
227 analytical datasets can be found in Supplementary Data 1.

228

229 The studies included in the primary dataset were conducted in 62 countries across 10 World  
230 Bank geographic regions, with most observations coming from East Africa (N = 60), South Asia  
231 (N = 41), Latin America and the Caribbean (N = 25), Western Africa (N = 24), and East Asia and

232 the Pacific (N = 23). Twenty of the observations came from nationally representative studies,  
233 and 53, 78, and 60 came from studies representative of first, second, and third administrative  
234 divisions, respectively (Figure S1). Studies included sampling completion dates between 2000  
235 and 2022, with most of the observations completed during 2005–2009 (N = 67) and 2010–2014  
236 (N = 67) (Figure S2).

237

238 Most observations in the primary dataset were from studies that asked a caregiver about care  
239 seeking for a child with diarrhea (N = 138, 65.4%) (Table 1). Others represented a combination  
240 of children, other family members, or the respondent themselves (N = 59, 28.0%) and a small  
241 proportion represented care seeking exclusively for the survey respondents (N = 14, 6.6%)  
242 (Table 1). A small proportion of observations represented responses from caregivers of  
243 individuals at a health facility (N = 11, 5.2%) (Table 1). More of the observations were from  
244 exclusively rural areas (N = 83, 39.3%) than exclusively urban areas (N = 68, 32.2%), and two  
245 (0.9%) came from internally displaced persons or refugees (Table 1). Seventeen (8.1%)  
246 observations took place during or closely following a diarrheal disease outbreak (Table 1).

247

248 The majority of the observations came from surveys where respondents were asked about care  
249 seeking for general diarrhea (N = 156, 73.8%), followed by either gastroenteritis or non-cholera  
250 etiologies (N = 33, 15.6%), and severe diarrhea or cholera including deaths (N = 22, 10.4%)  
251 (Table 1). Most observations focused on care seeking at any time during illness (N = 175,  
252 82.9%) and most used recall periods of 14-30 days (N = 143, 67.8%) (Table 1).

253

#### 254 **Trends in care seeking at hospitals or clinics in the unadjusted data**

255 Our primary interest was care-seeking at hospitals or clinics, where people can receive  
256 treatment and are most often counted in disease surveillance efforts. Since care seeking  
257 behavior among individuals at a clinic likely differs from care seeking behavior in the broader

258 community, we restricted the data in the analyses below to non-clinic-based studies unless  
259 otherwise noted.

260

261 We observed variations in care-seeking by geographic region (Figure S3a) and country income  
262 group (Figure S4a). These trends were inconsistent between case definitions, which also varied  
263 by income group (Figure S3b, Figure S4b). Specifically, in high-income countries (HICs), the  
264 most common case definitions were gastroenteritis or non-cholera etiologies, while severe  
265 diarrhea and cholera were more often studied in low- and middle-income countries (LMICs).  
266 Given a relatively low number of observations from high-income countries, we focus on care-  
267 seeking behavior in LMICs in the main analyses.

268

269 We found that the reported proportion seeking care at a hospital or clinic in 145 observations  
270 from LMICs was higher for observations from studies that surveyed participants about care  
271 seeking at any time during illness (median of 34.7%; N = 125; IQR, 18.9% to 55.0%) compared  
272 to their first source of care (median of 21.2%; N = 20; IQR, 10.0% to 33.5%) (Figure 2a) as well  
273 as studies conducted during or following a diarrheal disease outbreak (median of 62.7%; N =  
274 11; Interquartile Range (IQR), 44.2% to 65.5%) compared to those that were not (median of  
275 31.0%; N = 134; IQR, 15.3% to 49.9%) (Figure 2c). Care seeking at hospitals or clinics was also  
276 higher for severe diarrhea or cholera (median of 64.1%; N = 15; IQR, 45.4% to 70.0%)  
277 compared to general diarrhea (median of 31.0%; N = 122; IQR, 15.3% to 48.2%) and  
278 gastroenteritis or other etiologies (median of 33.3%; N = 8; IQR, 25.5% to 44.1%) (Figure 2b).  
279 Although we found no significant correlation between overall study quality and reported care  
280 seeking at hospitals or clinics (Spearman rho = 0.07; 95% Confidence Interval -0.09 to 0.23;  
281 Figure S5a), studies with internal inconsistencies identified during study quality assessment  
282 more often reported lower care seeking than those without (Figure S5b).

283

284 Studies that surveyed participants about their own care-seeking behavior reported lower levels  
285 of care-seeking on average compared to those focused on children (Figure 2d). Yet, across 134  
286 observations in LMICs that reported the age distribution of participants, we found no significant  
287 correlation between the proportion of the study population under five years of age and the  
288 proportion that sought care at hospitals or clinics (Spearman rho = 0.10; 95% Confidence  
289 Interval -0.08 to 0.26; Figure 3a). Studies conducted only among children reported higher care  
290 seeking at hospitals or clinics (median of 34.2%; N = 98; IQR, 17.5% to 55.0%) compared to  
291 studies conducted only among adults or individuals over five (median of 22.4%; N = 22; IQR,  
292 14.5% to 49.3%) (Figure 3c), but there was wide variation between studies and this trend held  
293 for diarrhea and gastroenteritis but not for severe diarrhea or cholera (Figure 3b,d).

294

#### 295 **Trends in care seeking at other sources outside the home in LMICs**

296 Hospitals and clinics were the most common source of care sought across studies in LMICs  
297 (median of 32.3%; N = 145; IQR, 17.0% to 52.6%) (Figure 4a), though they were less commonly  
298 the first source of care (median of 21.2%; N = 20; IQR, 10.0% to 33.5%) (Figure 4b). Seeking  
299 care from community health workers (CHW) was reported more often as first sources of care  
300 (median of 16.9%; N = 9; IQR, 4.5% to 18.9%) than the main or primary of care (median of  
301 6.2%; N = 32; IQR, 1.7% to 14.7%) (Figure 4b). Seeking care from CHW and health posts were  
302 also more frequently reported in observations from low-income compared to middle-income  
303 countries (Figure S6) and for general diarrhea compared to severe diarrhea or cholera (Figure  
304 S7). Traditional healers were rarely reported as a source of care (median of 4.0%; N = 48; IQR,  
305 1.0% to 8.7%) (Figure 4). These less common sources were also less frequently included or  
306 reported as options in survey questions than hospitals or clinics (Figure 4).

307

308 In studies that surveyed participants at a hospital or clinic, most participants reported  
309 hospitals/clinics as their first source of care (median of 89.3%; N = 4; IQR, 74.8% to 97.7%)

310 (Figure S8a). In studies that surveyed participants about where they sought care before their  
311 hospital or clinic visit, hospitals/clinics were the most common previous sources of care,  
312 (median of 35.1%; N = 2; IQR, 31.2% to 39.0%), followed by pharmacies (median of 20.7%; N =  
313 2; IQR, 18.7% to 20.4%), private hospitals/clinics (median of 10.6%; N = 2; IQR, 9.4% to  
314 11.9%), and traditional healers (median of 5.6%; N = 2; IQR, 5.4% to 5.8%) (Figure S8b).

315

### 316 **Adjusted estimates of care seeking at hospitals or clinics**

317 Using a random-effects meta-analysis, we estimated that on average 32.8% (95% Confidence  
318 Interval (CI) 28.1% to 37.9%) of individuals sought care at hospitals or clinics across 145  
319 observations in LMICs (Figure S9). In addition, we predicted that care seeking for a future study  
320 would be in the range of 3.3% to 87.5% (Figure S9). This wide prediction interval reflects the  
321 substantial variation we found between studies in care seeking ( $\tau^2 = 1.8$ ;  $I^2 = 99.3$ ; 95% CI, 99.2  
322 to 99.3), with adjusted study-level estimates of care seeking ranging from 0.7% (95% CI 0.5% to  
323 0.9%) to 94.4% (95% CI 90.6% to 97.0%) (Figure S9).

324

325 We estimated that the proportion of people that would seek care during a hypothetical diarrheal  
326 episode, as opposed to an actual previous episode, in LMICs was substantially higher, with  
327 71.2% (95% CI 57.1% to 83.2%; prediction interval 5.8% to 99.1%) intending to seek care at a  
328 hospital or clinic if they or their child had diarrhea across 29 observations (Figure S10). Care  
329 seeking was on average lower in HICs, with 23.9% (95% CI 16.2% to 33.8%; prediction interval  
330 2.5% to 79.6%) seeking care at a hospital or clinic when they or their child had a recent  
331 diarrheal episode (Figure S11).

332

### 333 **Factors associated with variation in care seeking at hospitals or clinics in LMICs**

334 We next examined factors associated with variation in care seeking in LMICs. In univariate  
335 analyses, we found that the odds of seeking health care at a hospital or clinic were higher for

336 severe diarrhea or cholera than general diarrhea, as well as during or after an outbreak and  
337 when a recall period exceeded 30 days (Table S2). If the question was restricted to the first  
338 source of care sought, the odds of seeking care at a hospital or clinic were lower (Table S2). We  
339 found no significant differences in care seeking between observations conducted among only  
340 children under five compared to those conducted only among individuals over five (OR 1.06  
341 (95% CI 0.55 to 2.01)) (Table 2). In a subset of eight studies with results stratified by age,  
342 differences in care seeking for individuals under five years of age compared to over five years  
343 remained non-significant, though there was a trend towards higher care seeking for children  
344 under five (OR 1.24 (95% CI 0.29 to 5.36)) (Table 2).

345

346 To examine potential confounding between the sources of variation in our dataset, we  
347 additionally tested for associations between the variables related to study design and setting  
348 specific attributes included in the univariate analyses above. We found that studies with severe  
349 diarrhea or cholera case definitions were associated with longer recall periods and were more  
350 likely to have been conducted during or after an outbreak compared with studies on general  
351 diarrhea (Table S3). In sub-analysis, we found that there was no longer an effect of being in an  
352 outbreak setting when subsetting to studies with severe diarrhea or cholera case definitions  
353 (Table S4). In addition, there was no longer an effect of recall period when subsetting the data  
354 to observations with general diarrhea case definitions (Table S4).

355

356 Since we could not separate the effects of case definition from recall period or outbreak context,  
357 we examined the effects of case definition on care seeking at hospitals or clinics adjusting only  
358 for the timing of care seeking (i.e., whether they were surveyed about their first source of care or  
359 care at any time during illness). The adjusted odds of seeking care for severe diarrhea or  
360 cholera remained significantly higher than for general diarrhea (OR 3.43 (95% CI 1.71 to 6.88))  
361 (Table 3), and residual heterogeneity remained high ( $\tau^2 = 1.57$ ;  $I^2 = 99.5$ ;  $R^2 = 10.2\%$ ).

362 Correspondingly, when we stratified the meta-analysis by case definition, we estimated that  
363 58.6% (95% CI 39.9% to 75.2%; Prediction Interval 5.2% to 97.3%) of individuals sought care at  
364 a hospital or clinic when they or their child had severe diarrhea or cholera (Figure S13)  
365 compared to 29.9% (95% CI 25.3% to 35.1%; Prediction Interval 3.1% to 84.9%) for general  
366 diarrhea (Figure S12) and 35.8% (95% CI 23.7% to 50.0%; Prediction Interval 6.5% to 81.8%)  
367 for gastroenteritis and non-cholera etiologies (Figure S14).

368

### 369 Discussion

370 Here we estimated that most people with diarrhea (on average 67%) do not seek care at  
371 hospitals or clinics where they can receive treatment when needed and be counted in typical  
372 surveillance systems. We found substantial variation between studies, even after accounting for  
373 sources of variation such as case definition and timing of care seeking. Hospitals and clinics  
374 were the most common source of care investigated and reported, with pharmacies, CHW, and  
375 health posts less commonly reported, and traditional healers very rarely cited as a source of  
376 care. Studies that phrased questions in terms of hypothetical care seeking reported substantially  
377 higher care seeking than those that asked about actual diarrheal episodes. We found no  
378 significant differences in care seeking between children under five and older individuals, and the  
379 odds of seeking care for severe diarrhea and cholera were significantly higher compared to  
380 general diarrhea.

381

382 Our findings shed light on the extent to which we may underestimate diarrhea burden when we  
383 rely solely on passive surveillance data, with the greatest underestimates occurring,  
384 unsurprisingly, among individuals with mild or moderate symptoms. Additionally, our findings  
385 suggest that the relationship between age and care-seeking behavior varies by location,  
386 context, and etiology. While we found trends towards adults seeking care less often for  
387 themselves than for children with diarrhea, we found that, on average, adults sought care for

388 severe diarrhea and cholera at similar rates as for children. Given these results and the  
389 considerable heterogeneity across studies, we recommend that local data on care-seeking  
390 behavior, stratified by age and either symptom severity or etiology, be used to adjust burden  
391 estimates whenever possible. In the absence of local data or for global analyses, the case-  
392 definition-stratified estimates from this review may provide useful approximations of missed  
393 symptomatic cases.

394

395 Although we estimated lower average care-seeking rates than previous analyses of DHS data  
396 (33% here vs. 45-51% in DHS data)—possibly due to our inclusion of a broader range of study  
397 settings and populations—our findings of very low reported care-seeking at CHW and traditional  
398 healers align with those studies [5–9]. This may reflect true patterns of care-seeking behavior,  
399 but it could also indicate a research bias, as hospitals and clinics were more frequently included  
400 in survey questionnaires than other sources of care. Additionally, only a minority of studies  
401 reported results where multiple sources of care were selected, and individuals may be less likely  
402 to report CHW or traditional healers as their sole or primary source of care. This is supported by  
403 our finding that CHW were reported more frequently, and hospitals and clinics less frequently, in  
404 studies that examined the first source of care rather than overall source of care. These  
405 limitations could have led us and others to under-estimate the role of CHW and traditional  
406 healers in diarrhea case management.

407

408 This study has several additional limitations. Only a small proportion of the included studies  
409 were conducted among adults or individuals over five years old and care seeking in those  
410 studies varied widely, which may have prevented us from identifying significant trends.  
411 Methodology and questionnaires also varied between studies, which we may not have fully  
412 captured in our analysis, and there were several variables we could not examine due to data  
413 scarcity or potential confounding (e.g., income group, outbreak setting, and recall period).



414

415 We also estimated that more than twice as many people would seek care as actually did, but we  
416 were not able to examine factors that shape care seeking behavior in detail. Decisions about  
417 whether and where to seek care are complex, with tradeoffs and determining factors that vary  
418 by location, time, and individuals. Existing theories for health service utilization describe a wide  
419 range of factors influencing care seeking, including environmental and health system factors  
420 (e.g., provider and treatment availability, transportation and access), population and socio-  
421 demographic factors (e.g., age, gender, income, culture, community support, disease  
422 prevalence), and individual behavior (e.g., perceptions about disease risk and severity, health  
423 care costs, and benefits) [24]. The huge heterogeneity we found in care seeking, even after  
424 accounting for different aspects of study methodology, may result from the propagation of  
425 individual heterogeneity in decision making and contextual factors. An important area for future  
426 research will be to examine these factors to identify ways in which care seeking could be  
427 improved, especially for severe cases.

428

429 Given our findings, and their limitations, we propose several areas for future work. First, it will be  
430 important for future studies to include questions about care seeking across ages and diarrhea  
431 case definitions, include a broad range of sources of care including health posts and CHW, and  
432 focus on actual rather than hypothetical care seeking where possible. In addition, studies that  
433 explicitly examine the order that individuals seek care at different sources (for example, [25–27])  
434 can help inform when and why there may be delays in seeking care at hospitals or clinics and  
435 how this varies by age and disease severity. Finally, synthesizing qualitative studies that  
436 examine reasons why individuals do or do not seek care could provide insight into non-hospital-  
437 based care seeking as well as what needs to be done to reduce barriers for populations with the  
438 least interaction with the health system.

439

440 In summary, our findings suggest that care-seeking estimates for broadly defined diarrhea may  
441 not reflect true patterns, particularly for severe symptoms. Conclusions about care-seeking  
442 behaviors across age groups were less straightforward, as we found trends but no significant  
443 differences between children under five and older individuals. DHS data may reasonably  
444 approximate general care-seeking patterns for non-severe, non-etiology-specific diarrhea for the  
445 locations in which they were collected and in the absence of additional information. When  
446 possible, assumptions about the relationship between age and care seeking should be setting-  
447 specific, as adult care-seeking was not universally equivalent or lower.

448

#### 449 Funding

450 This study was supported by the Bill and Melinda Gates Foundation (INV-044865 to ASA) and  
451 the National Institute of Allergy and Infectious Diseases (K22AI168389 to KEW).

452

#### 453 Conflicts of interest

454 The authors declare no conflicts of interest.

455

#### 456 References

- 457 1. Troeger C, Blacker BF, Khalil IA, Rao PC, Cao S, Zimsen SR, et al. Estimates of the  
458 global, regional, and national morbidity, mortality, and aetiologies of diarrhoea in 195  
459 countries: a systematic analysis for the Global Burden of Disease Study 2016. *The Lancet*  
460 *Infectious Diseases*. 2018;18: 1211–1228. doi:10.1016/S1473-3099(18)30362-1
- 461 2. Troeger CE, Khalil IA, Blacker BF, Biehl MH, Albertson SB, Zimsen SRM, et al. Quantifying  
462 risks and interventions that have affected the burden of diarrhoea among children younger  
463 than 5 years: an analysis of the Global Burden of Disease Study 2017. *The Lancet*  
464 *Infectious Diseases*. 2020;20: 37–59. doi:10.1016/S1473-3099(19)30401-3
- 465 3. Perez-Saez J, Zheng Q, Kaminsky J, Zou K, Demby MN, Alam C, et al. A decade of  
466 shifting cholera burden in Africa and its implications for control: a statistical mapping  
467 analysis. *medRxiv*; 2024. p. 2024.09.23.24314072. doi:10.1101/2024.09.23.24314072
- 468 4. Ali M, Nelson AR, Lopez AL, Sack DA. Updated global burden of cholera in endemic  
469 countries. *PLOS Neglected Tropical Diseases*. 2015;9: e0003832.  
470 doi:10.1371/journal.pntd.0003832

- 471 5. Page AL, Hustache S, Luquero FJ, Djibo A, Manzo ML, Grais RF. Health care seeking  
472 behavior for diarrhea in children under 5 in rural Niger: results of a cross-sectional survey.  
473 BMC Public Health. 2011;11: 389. doi:10.1186/1471-2458-11-389
- 474 6. Fissehaye T, Damte A, Fantahun A, Gebrekirstos K. Health care seeking behaviour of  
475 mothers towards diarrheal disease of children less than 5 years in Mekelle city, North  
476 Ethiopia. BMC Research Notes. 2018;11: 749. doi:10.1186/s13104-018-3850-3
- 477 7. Nasrin D, Wu Y, Blackwelder WC, Farag TH, Saha D, Sow SO, et al. Health care seeking  
478 for childhood diarrhea in developing countries: evidence from seven sites in Africa and  
479 Asia. Am J Trop Med Hyg. 2013;89: 3–12. doi:10.4269/ajtmh.12-0749
- 480 8. Nhampossa T, Mandomando I, Acacio S, Nhalungo D, Sacoora C, Nhacolo A, et al. Health  
481 care utilization and attitudes survey in cases of moderate-to-severe diarrhea among  
482 children ages 0–59 months in the district of Manhica, Southern Mozambique. Am J Trop  
483 Med Hyg. 2013;89: 41–48. doi:10.4269/ajtmh.12-0754
- 484 9. Winter R, Wang W, Florey L, Pullum T. Levels and trends in care seeking for childhood  
485 illness in USAID MCH priority countries. 2015 [cited 10 Jan 2023]. Available:  
486 <https://dhsprogram.com/publications/publication-cr38-comparative-reports.cfm>
- 487 10. Yaya S, Odusina EK, Adjei NK. Health care seeking behaviour for children with acute  
488 childhood illnesses and its relating factors in sub-Saharan Africa: evidence from 24  
489 countries. Tropical Medicine and Health. 2021;49: 95. doi:10.1186/s41182-021-00385-1
- 490 11. Bogler L, Weber A-C, Ntambi J, Simen-Kapeu A, Zagre NM, Ekpini RE, et al. Health-care  
491 seeking for childhood diseases by parental age in Western and Central Africa between  
492 1995 and 2017: A descriptive analysis using DHS and MICS from 23 low- and middle-  
493 income countries. J Glob Health. 2021;11: 13010. doi:10.7189/jogh.11.13010
- 494 12. Hodgins S, Pullum T, Dougherty L. Understanding where parents take their sick children  
495 and why it matters: a multi-country analysis. Global Health: Science and Practice. 2013;1:  
496 328–356. doi:10.9745/GHSP-D-13-00023
- 497 13. Geldsetzer P, Williams TC, Kirolos A, Mitchell S, Ratcliffe LA, Kohli-Lynch MK, et al. The  
498 recognition of and care seeking behaviour for childhood illness in developing countries: a  
499 systematic review. PLOS ONE. 2014;9: e93427. doi:10.1371/journal.pone.0093427
- 500 14. Abuzerr S, Nasser S, Yunesian M, Hadi M, Mahvi AH, Nabizadeh R, et al. Prevalence of  
501 diarrheal illness and healthcare-seeking behavior by age-group and sex among the  
502 population of Gaza strip: a community-based cross-sectional study. BMC Public Health.  
503 2019;19: 704. doi:10.1186/s12889-019-7070-0
- 504 15. Chowdhury F, Khan IA, Patel S, Siddiq AU, Saha NC, Khan AI, et al. Diarrheal illness and  
505 healthcare seeking behavior among a population at high risk for diarrhea in Dhaka,  
506 Bangladesh. PLOS ONE. 2015;10: e0130105. doi:10.1371/journal.pone.0130105
- 507 16. Page MJ, McKenzie JE, Bossuyt PM, Boutron I, Hoffmann TC, Mulrow CD, et al. The  
508 PRISMA 2020 statement: an updated guideline for reporting systematic reviews. BMJ.  
509 2021;372: n71. doi:10.1136/bmj.n71

- 510 17. Wiens KE, Ashlynn SP, Costello DJ, Shipper AG, Lee EC, Azman AS. Care seeking for  
511 diarrheal illness: a systematic review and meta-analysis. PROSPERO CRD42023402435.  
512 2023 [cited 15 Nov 2023]. Available:  
513 [https://www.crd.york.ac.uk/prospéro/display\\_record.php?ID=CRD42023402435](https://www.crd.york.ac.uk/prospéro/display_record.php?ID=CRD42023402435)
- 514 18. Downes MJ, Brennan ML, Williams HC, Dean RS. Development of a critical appraisal tool  
515 to assess the quality of cross-sectional studies (AXIS). *BMJ Open*. 2016;6: e011458.  
516 doi:10.1136/bmjopen-2016-011458
- 517 19. R Core Team. R: a language and environment for statistical computing. R Foundation for  
518 Statistical Computing, Vienna, Austria. 2024. Available: <https://www.R-project.org/>
- 519 20. World Bank Data Help Desk. World Bank Country and Lending Groups. 2024 [cited 6 May  
520 2024]. Available: [https://datahelpdesk.worldbank.org/knowledgebase/articles/906519-](https://datahelpdesk.worldbank.org/knowledgebase/articles/906519-world-bank-country-and-lending-groups)  
521 [world-bank-country-and-lending-groups](https://datahelpdesk.worldbank.org/knowledgebase/articles/906519-world-bank-country-and-lending-groups)
- 522 21. Omore R, O'Reilly CE, Williamson J, Moke F, Were V, Farag TH, et al. Health care-  
523 seeking behavior during childhood diarrheal illness: results of health care utilization and  
524 attitudes surveys of caretakers in western Kenya, 2007-2010. *Am J Trop Med Hyg*.  
525 2013;89: 29–40. doi:10.4269/ajtmh.12-0755
- 526 22. Balduzzi S, Rücker G, Schwarzer G. How to perform a meta-analysis with R: a practical  
527 tutorial. *BMJ Ment Health*. 2019;22: 153–160. doi:10.1136/ebmental-2019-300117
- 528 23. Viechtbauer W. Conducting meta-analyses in R with the metafor package. *Journal of*  
529 *Statistical Software*. 2010;36: 1–48. doi:10.18637/jss.v036.i03
- 530 24. Gliedt JA, Spector AL, Schneider MJ, Williams J, Young S. A description of theoretical  
531 models for health service utilization: a scoping review of the literature. *Inquiry: A Journal of*  
532 *Medical Care Organization, Provision and Financing*. 2023;60: 00469580231176855.  
533 doi:10.1177/00469580231176855
- 534 25. Escobedo AA, Almirall P, Ávila I, Salazar Y, Alfonso M. Care-seeking behaviour and  
535 diagnostic processes for symptomatic giardiasis in children attending an academic  
536 paediatric hospital. *Pathogens and Global Health*. 2014;108: 271–278.  
537 doi:10.1179/2047773214Y.0000000152
- 538 26. Newbrander W, Ickx P, Werner R, Mujadidi F. Compliance with referral of sick children: a  
539 survey in five districts of Afghanistan. *BMC Pediatrics*. 2012;12: 46. doi:10.1186/1471-  
540 2431-12-46
- 541 27. Soremekun S, Kasteng F, Lingam R, Vassall A, Kertho E, Settumba S, et al. Variation in  
542 the quality and out-of-pocket cost of treatment for childhood malaria, diarrhoea, and  
543 pneumonia: Community and facility based care in rural Uganda. *PLOS ONE*. 2018;13:  
544 e0200543. doi:10.1371/journal.pone.0200543
- 545
- 546
- 547

548 Tables

549 **Table 1. Study characteristics.** Number of observations in the primary dataset with each characteristic.

550 A study has more than one observation if it reported results stratified by any of these characteristics.

| Category                                                  | Characteristic                                    | Number (N = 211) | Percent (%) |
|-----------------------------------------------------------|---------------------------------------------------|------------------|-------------|
| Timing of care seeking                                    | Care sought at any time                           | 175              | 82.9        |
|                                                           | First source sought                               | 29               | 13.7        |
|                                                           | Care sought prior to current hospital visit       | 6                | 2.8         |
|                                                           | Care sought within 24 hours of symptom onset      | 1                | 0.5         |
| Relationship of diarrhea case to survey respondent        | Child (of survey respondent)                      | 138              | 65.4        |
|                                                           | Self (survey respondent)                          | 14               | 6.6         |
|                                                           | Combination (child, self, or other family member) | 59               | 28.0        |
| Survey recall period                                      | 2-7 days before interview                         | 13               | 6.2         |
|                                                           | 14-30 days before interview                       | 143              | 67.8        |
|                                                           | 42-365 days before interview                      | 18               | 8.5         |
|                                                           | Not reported                                      | 37               | 17.5        |
| Clinic-based surveillance                                 | No                                                | 198              | 93.8        |
|                                                           | Yes                                               | 13               | 6.2         |
| During or recently after an outbreak that causes diarrhea | No                                                | 194              | 91.9        |
|                                                           | Yes                                               | 17               | 8.1         |
| Multiple choices for types of care sought                 | No                                                | 180              | 85.3        |
|                                                           | Yes                                               | 31               | 14.7        |

|                                                |                                              |     |      |
|------------------------------------------------|----------------------------------------------|-----|------|
| Study location type                            | Rural                                        | 83  | 39.3 |
|                                                | Urban                                        | 68  | 32.2 |
|                                                | Urban and Rural                              | 52  | 24.6 |
|                                                | Peri-Urban                                   | 5   | 2.4  |
|                                                | Internally Displaced Persons or Refugee Camp | 2   | 0.9  |
|                                                | Urban and Peri-Urban                         | 1   | 0.5  |
| Country World Bank 2023-2024 income group [20] | Lower middle income                          | 97  | 46.0 |
|                                                | Upper middle income                          | 44  | 20.9 |
|                                                | Low income                                   | 43  | 20.4 |
|                                                | High income                                  | 27  | 12.8 |
| Diarrhea case definition                       | Diarrhea                                     | 156 | 73.9 |
|                                                | Gastroenteritis or other etiologies          | 33  | 15.6 |
|                                                | Severe diarrhea or cholera                   | 22  | 10.4 |

551  
552  
553  
554  
555  
556  
557  
558

**Table 2. Sub-analyses of age and care seeking at hospitals or clinics in LMICs.** Odds that an individual seeks care for diarrheal illness for a child under five years of age compared to an adult or individual over five years of age. Results from two sub-analyses are shown: 1) studies only among children or only among adults, and 2) studies with care seeking stratified for children and adults. p-values are shown for the univariate mixed-effects models; n.s. indicates not significant ( $p > 0.05$ ).

| Sub-analysis                                                      | Age category | Odds ratio         | p-value |
|-------------------------------------------------------------------|--------------|--------------------|---------|
| Observations among only children (N = 98) or only adults (N = 22) | Over five    | 1 [Reference]      |         |
|                                                                   | Under five   | 1.06 (0.55 - 2.01) | n.s.    |

|                                                          |            |                    |      |
|----------------------------------------------------------|------------|--------------------|------|
| Observations with care seeking stratified by age (n = 8) | Over five  | 1 [Reference]      |      |
|                                                          | Under five | 1.24 (0.29 - 5.36) | n.s. |

559

560

561 **Table 3. Factors associated with variation in care seeking at hospitals or clinics in LMICs.** Odds  
 562 that an individual sought care for diarrheal illness for severe diarrhea or cholera and gastroenteritis or  
 563 other etiologies compared to general diarrhea, adjusting for timing of care seeking. p-values are shown  
 564 for the multivariate mixed-effects model; n.s. indicates not significant ( $p > 0.05$ ).

| Variable                 | Category                            | Odds ratio         | p-value |
|--------------------------|-------------------------------------|--------------------|---------|
| Diarrhea case definition | Diarrhea                            | 1 [Reference]      |         |
|                          | Severe diarrhea or cholera          | 3.43 (1.71 - 6.88) | < 0.001 |
|                          | Gastroenteritis or other etiologies | 1.15 (0.46 - 2.90) | n.s.    |
| Timing of care seeking   | Care sought at any time             | 1 [Reference]      |         |
|                          | First source sought                 | 0.44 (0.24 - 0.80) | < 0.01  |

565

566

567

568 Figure legends

569 **Figure 1. PRISMA flow diagram.** Diagram illustrates the search, screening, and inclusion  
 570 process for the systematic review, including databases searched, reasons for exclusion, and  
 571 final studies included in the meta-analyses.

572

573 **Figure 2. Proportion that sought care at a hospital or clinic in LMICs by observation**  
 574 **characteristics.** Proportion of respondents that reported seeking care for diarrheal illness at a  
 575 hospital or clinic grouped by **A)** whether the study surveyed participants about care seeking at  
 576 any time during illness or their first source of care, **B)** survey respondent category, **C)** whether

577 or not the study described an outbreak, and **D**) whether the care seeking was for the respondent  
578 themselves, their child, or other, which often included any household member. Each point  
579 represents an observation (N = 145). Boxes represent the median and interquartile range (IQR)  
580 of the proportion for each group. Lines extend from the top and bottom of box to the largest  
581 proportion value no further than  $1.5 * IQR$  from the box.

582

583 **Figure 3. Relationship between age and care seeking at hospitals or clinics in LMICs. A-**  
584 **B)** Relationship between the proportion of respondents that reported seeking care for diarrheal  
585 illness at a hospital or clinic (y-axis) and the proportion of the study population under five years  
586 of age (x-axis), **A**) overall and **B**) stratified by diarrhea case definition. Size of points is  
587 proportional to the number of survey respondents per observation (N = 134). Spearman's rho is  
588 shown with 95% confidence interval (CI) in green. Linear relationships are shown with purple  
589 lines. **C-D)** Proportion seeking care grouped by studies that were exclusively among children  
590 under five (N = 98) or exclusively among individuals over five (N = 22), **C**) overall and **D**)  
591 stratified by diarrhea case definition.

592

593 **Figure 4. Proportion that sought care by source in LMICs.** Proportion of respondents that  
594 reported seeking care for diarrheal illness at all categories of care sources, including any care  
595 outside of the home, hospitals or clinics including public facilities, private hospitals or clinics,  
596 pharmacies or kiosks, health posts, community healthcare workers (CHW), traditional healers,  
597 and friends or family, for **A**) all studies and **B**) the subset of studies that asked survey  
598 respondents about the first source of care they sought. Each point represents an observation.



Identification

Studies from databases/registers (**n = 7069**)

Embase (n = 3561)  
 PubMed (n = 2372)  
 Web of Science (n = 1123)  
 Global Index Medicus (n = 13)

References removed (**n = 1881**)

Duplicates identified manually (n = 73)  
 Duplicates identified by Covidence (n = 1808)

Screening

Studies screened (**n = 5188**)

Studies not relevant (**n = 4466**)

Studies assessed for eligibility (**n = 722**)

Studies excluded (**n = 534**)

Qualitative (n = 46)  
 Case control (n = 5)  
 Duplicate data (n = 11)  
 Convenience sample (n = 24)  
 Special population (n = 5)  
 Illness not diarrhea (n = 93)  
 No care seeking data (n = 78)  
 Not primary research (n = 57)  
 Full text not available (n = 71)  
 No care seeking questions (n = 98)  
 Sampling done before 2000 (n = 19)  
 Sampling method not reported (n = 17)  
 Not English, French or Spanish (n = 10)

Included

Studies included in review (**n = 188**)

Non-overlapping studies included in analysis (**n = 166**)

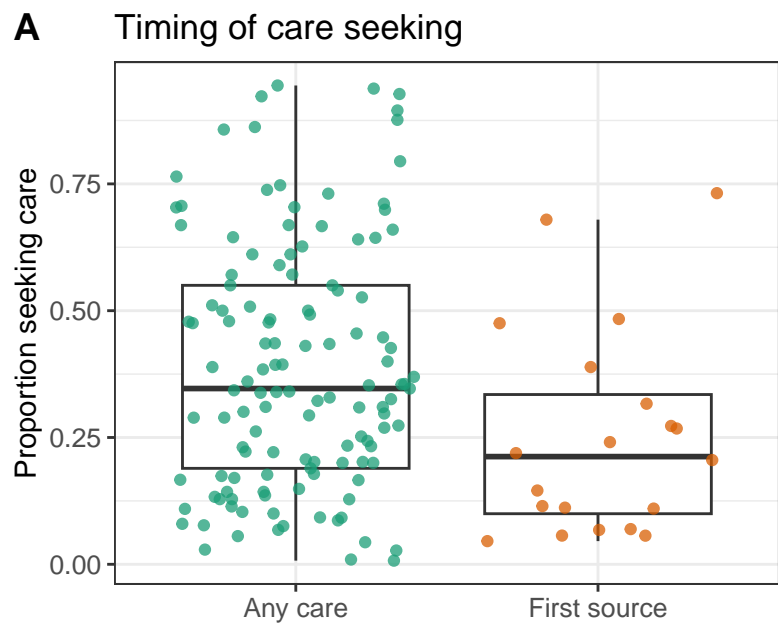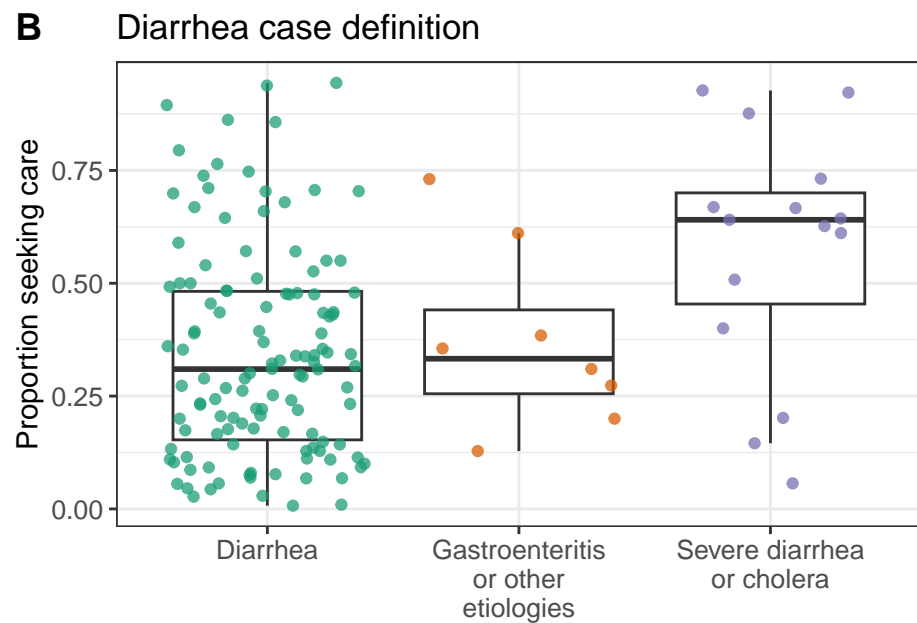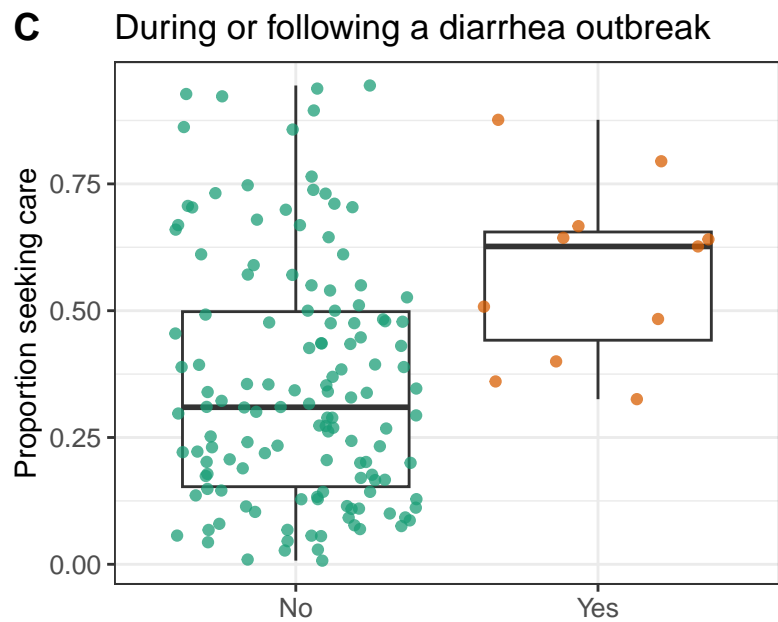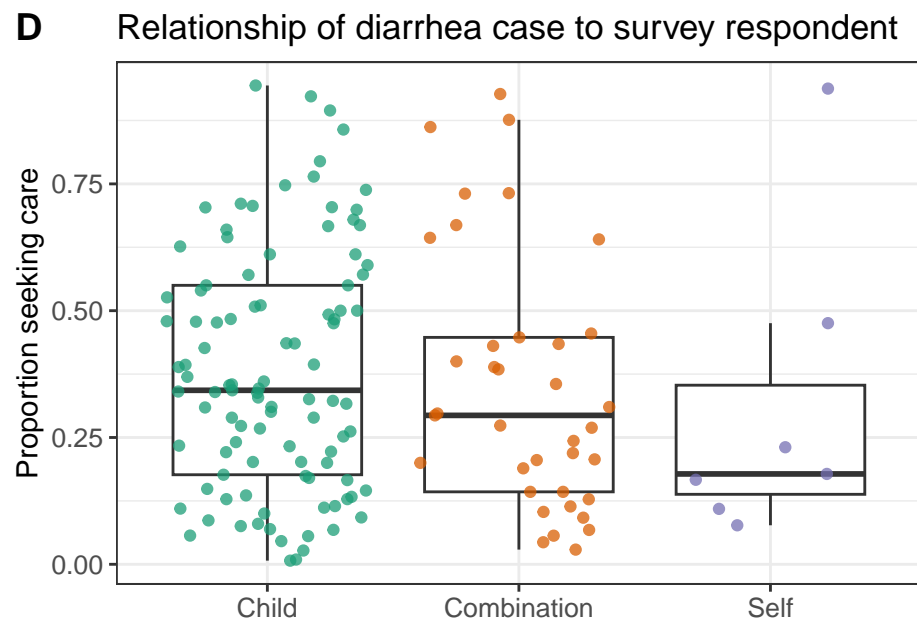

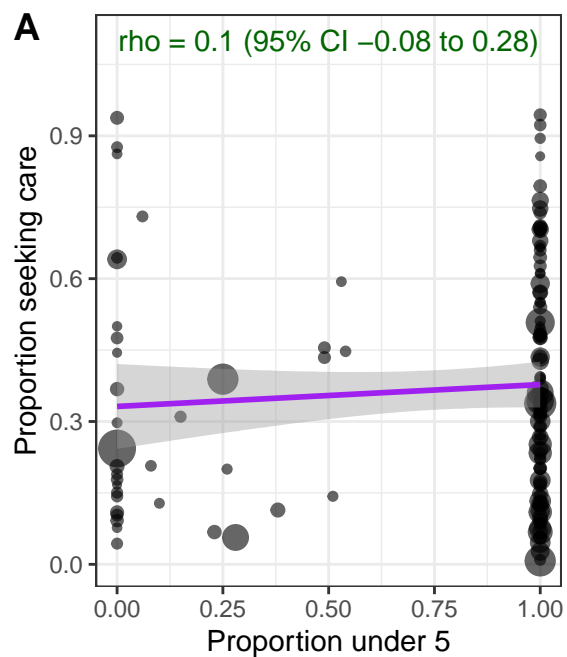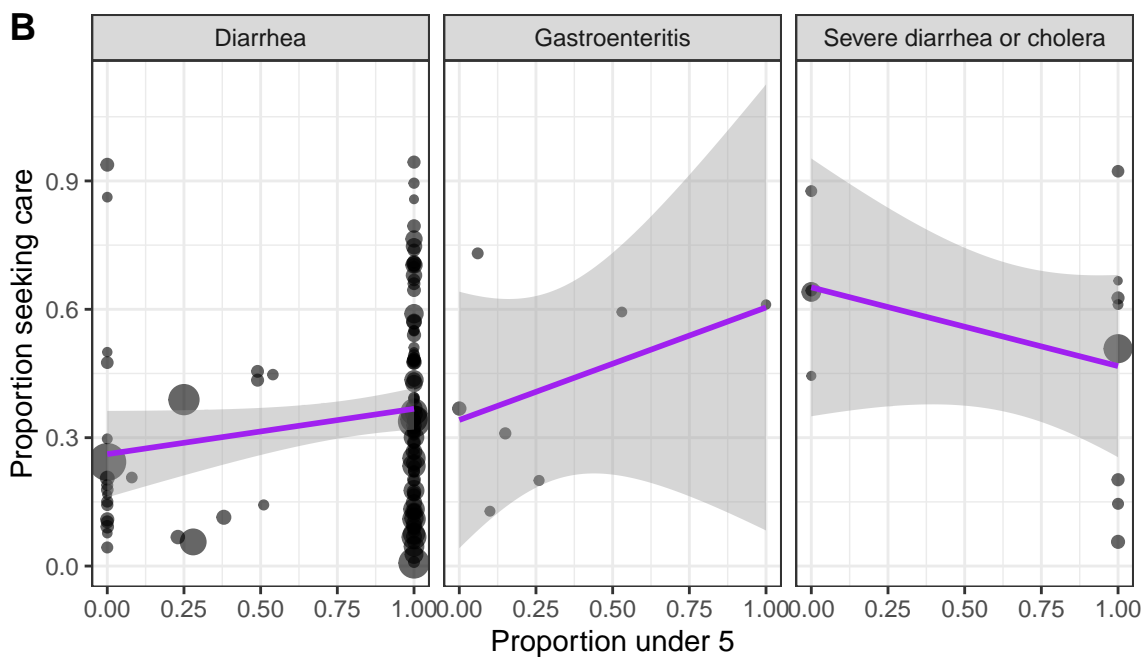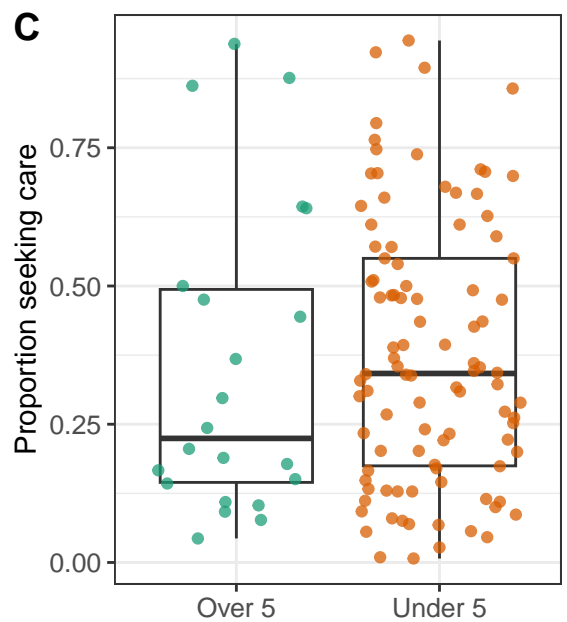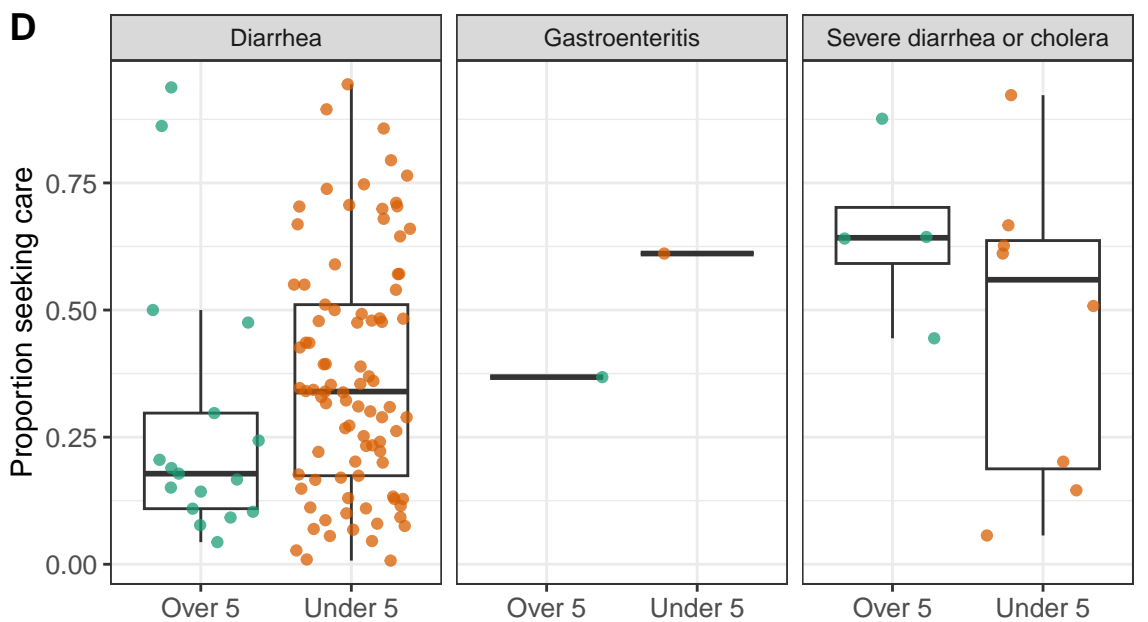

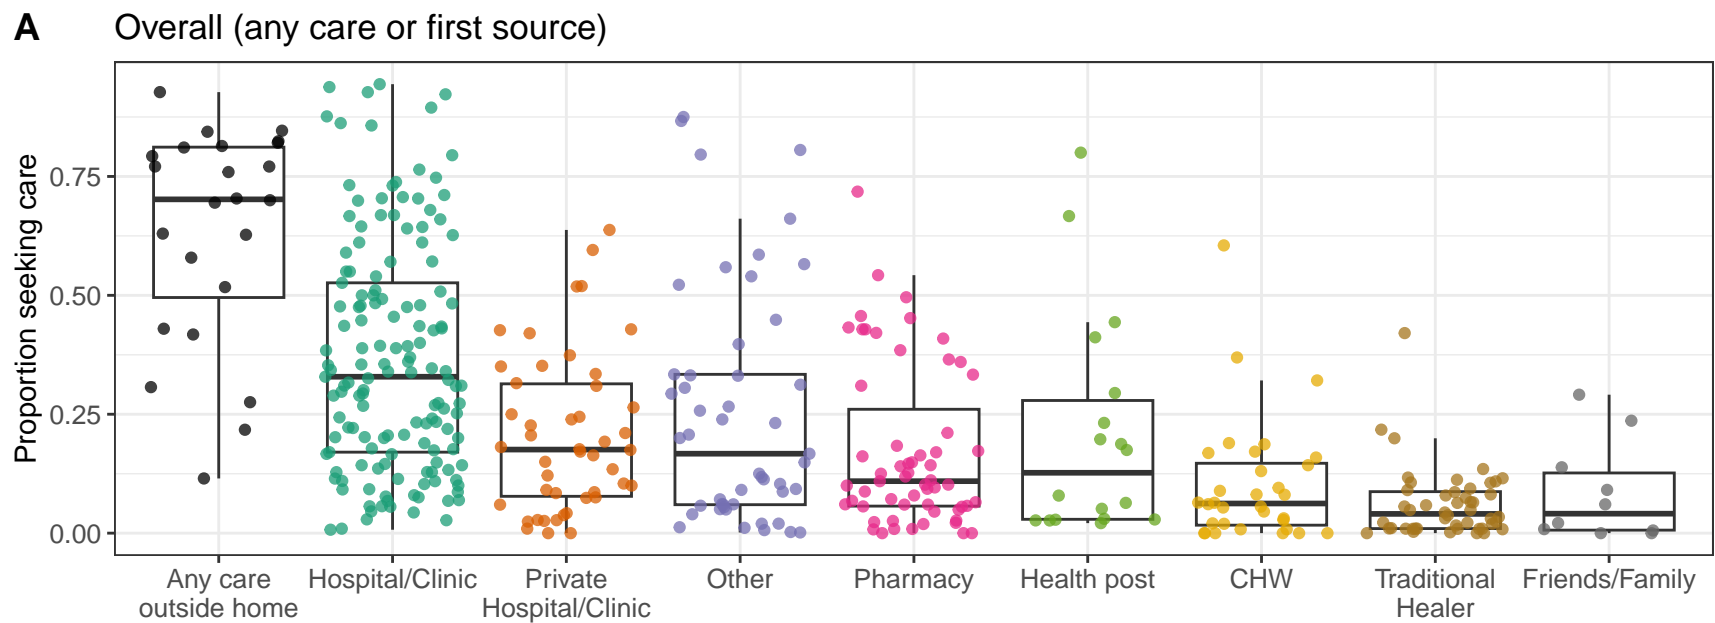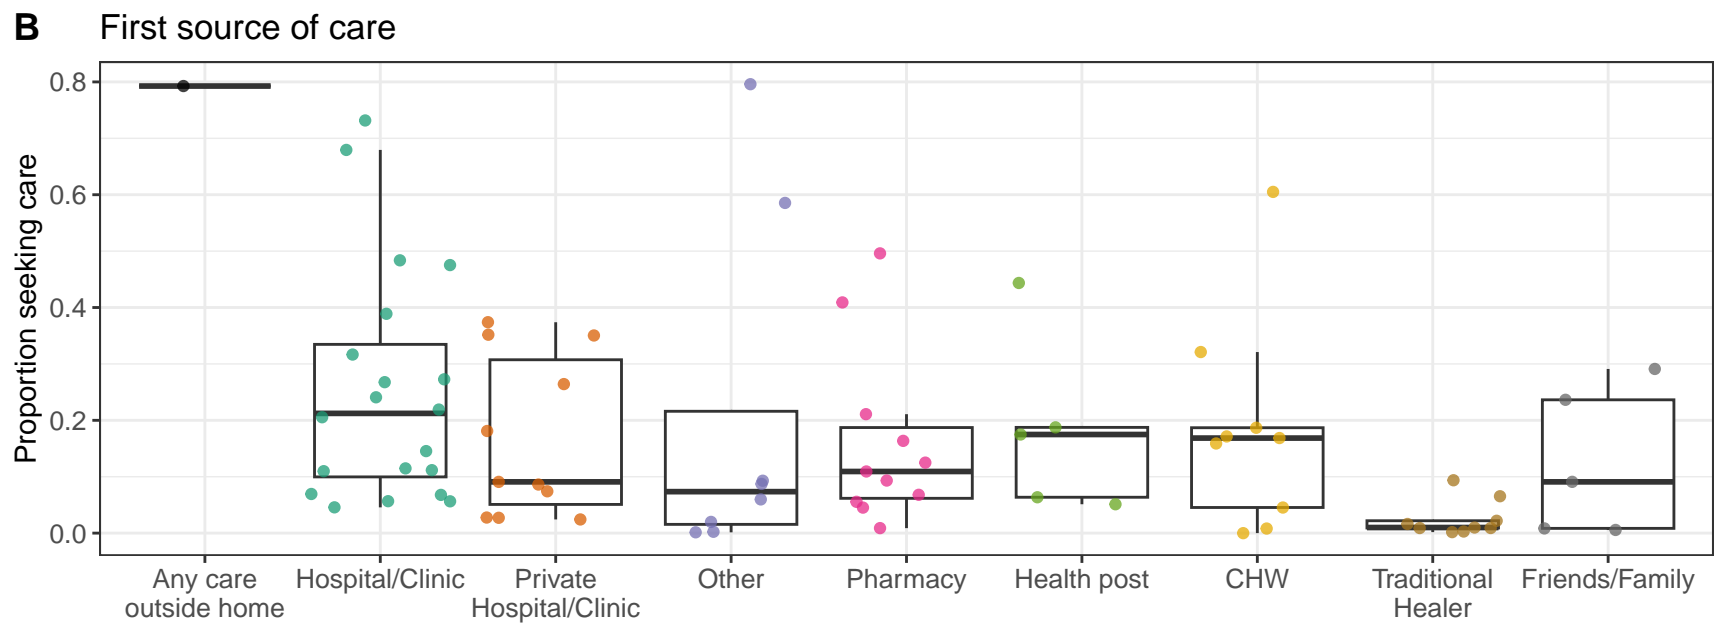

Source: https://medrxiv.org/content/medrxiv/early/2024/12/11/2024.12.11.24318799.full.pdf
